# Supplementary material for: Nicotinamide N-methyltransferase enhances chemoresistance in breast cancer through SIRT1 protein stabilization
Source: Springer Nature journal article supplement (doi:10.1186/s13058-019-1150-z), 2019-05-17
Supplement: MOESM1 [file 16732068]

**Table S1.** Association of NNMT expression with clinicopathological characteristics in

165 patients with breast cancer

| Patients' characteristics | n              | NNMT <sup>h</sup> (%) | Pearson's $\chi^2$ | P     |
|---------------------------|----------------|-----------------------|--------------------|-------|
| Total                     | 165            | 89 (53.9)             |                    |       |
| Age (years)<br>Median=50  | ≤ 50 (89)      | 53 (60.0)             | 2.449              | 0.118 |
|                           | > 50 (76)      | 36 (47.4)             |                    |       |
| ER                        | Positive (120) | 62 (51.7)             | 0.915              | 0.339 |
|                           | Negative (45)  | 27 (60.0)             |                    |       |
| PR                        | Positive (105) | 54 (51.4)             | 0.733              | 0.392 |
|                           | Negative (60)  | 35 (58.3)             |                    |       |
| HER-2                     | Positive (93)  | 54 (58.1)             | 1.914              | 0.166 |
|                           | Negative (70)  | 33 (47.1)             |                    |       |
| Ki-67                     | Positive (75)  | 39 (52.0)             | 0.076              | 0.783 |
|                           | Negative (70)  | 38 (54.3)             |                    |       |
| TNM                       |                |                       |                    |       |
| 0                         | 0              | 0 (0)                 | 1.594              | 0.661 |
| I                         | 46             | 27 (58.7)             |                    |       |
| II                        | 89             | 48 (53.9)             |                    |       |
| III                       | 27             | 12 (44.4)             |                    |       |
| IV                        | 3              | 2 (66.7)              |                    |       |
| TNM2                      |                |                       |                    |       |
| 0+ I +II                  | 128            | 68 (53.1)             | 0.152              | 0.696 |
| III+ IV                   | 37             | 21 (56.8)             |                    |       |
| Primary tumor size        |                |                       |                    |       |
| Tis                       | 1              | 0 (0)                 | 2.624              | 0.623 |
| T1                        | 71             | 42 (59.2)             |                    |       |
| T2                        | 78             | 40 (51.3)             |                    |       |
| T3                        | 10             | 5 (50.0)              |                    |       |
| T4                        | 5              | 2 (40.0)              |                    |       |
| Lymph node metastasis     |                |                       |                    |       |
| N0                        | 86             | 48 (55.8)             | 3.924              | 0.270 |
| N1                        | 53             | 30 (56.6)             |                    |       |
| N2                        | 17             | 9 (52.9)              |                    |       |
| N3                        | 9              | 2 (22.2)              |                    |       |
| Distant metastasis        |                |                       |                    |       |
| M0                        | 162            | 88 (54.3)             | 0.522              | 0.470 |
| M1                        | 3              | 1 (33.3)              |                    |       |

NNMT<sup>h</sup>: NNMT high expression
