# Supplementary material for: Nicotinamide N-methyltransferase enhances chemoresistance in breast cancer through SIRT1 protein stabilization
Source: Springer Nature journal article supplement (doi:10.1186/s13058-019-1150-z), 2019-05-17
Supplement: MOESM2 [file 16732068]

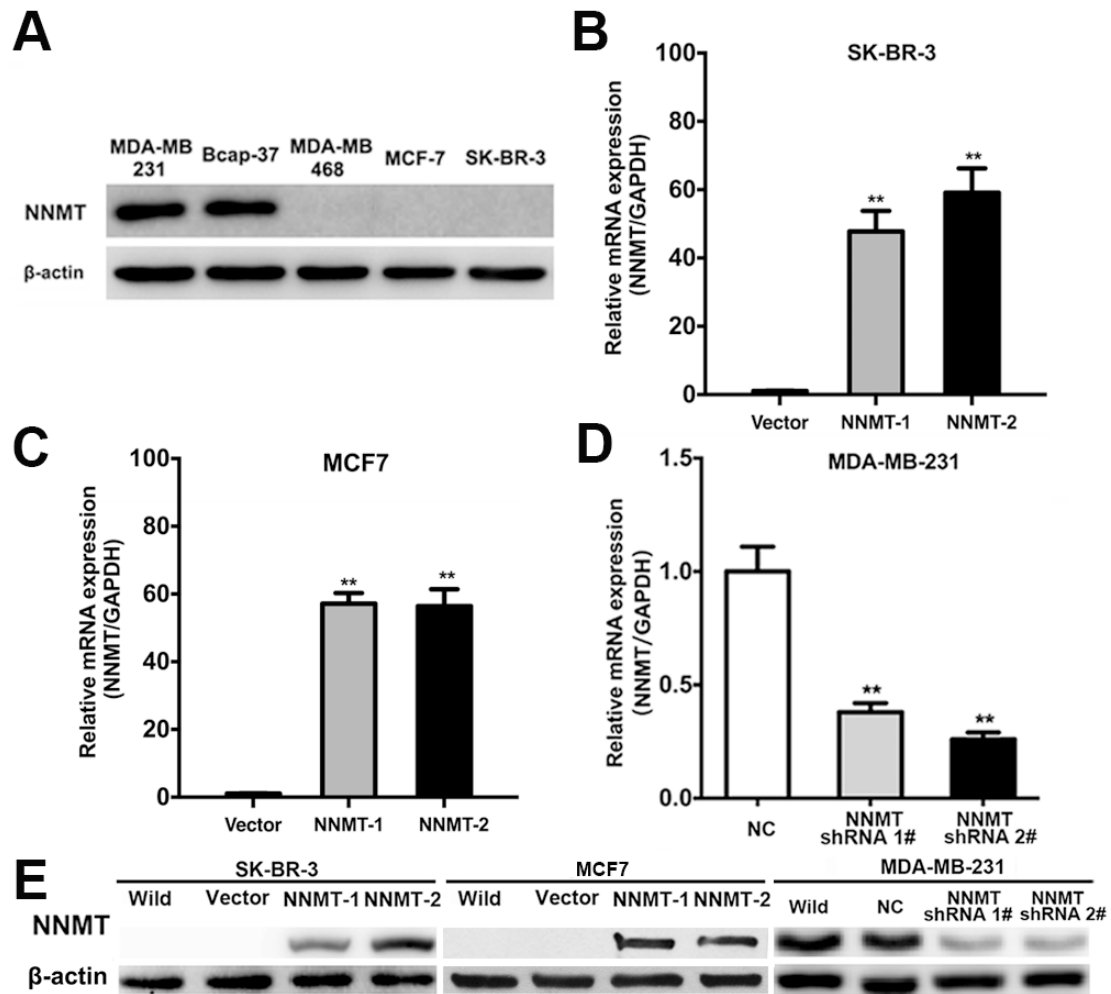

**Figure S1.** Expression of NNMT in breast cancer cells and the cell models of SK-BR-3, MCF7 and MDA-MB-231. **A** Expression of NNMT protein was detected by Western blotting in five breast cancer cells.  $\beta$ -actin was used as internal control. **B**, **C** and **D** Expression of NNMT mRNA was detected by real-time quantitative PCR. GAPDH was used as internal control. The relative NNMT mRNA level was determined using the  $2^{-(\Delta\Delta Ct)}$  method where  $\Delta\Delta Ct = \Delta Ct(\text{treated groups}) - \Delta Ct(\text{wild groups})$  and  $\Delta Ct = (Ct_{NNMT} - Ct_{GAPDH})$ . Data are presented as the mean  $\pm$  SEM ( $n=3$ ) (\*\* $p < 0.01$ ). **E** Expression of NNMT protein was detected by Western-blotting.  $\beta$ -actin was used as internal control. The result is representative of three independent experiments.
