# Supplementary material for: Nicotinamide N-methyltransferase enhances chemoresistance in breast cancer through SIRT1 protein stabilization
Source: Springer Nature journal article supplement (doi:10.1186/s13058-019-1150-z), 2019-05-17
Supplement: MOESM3 [file 16732068]

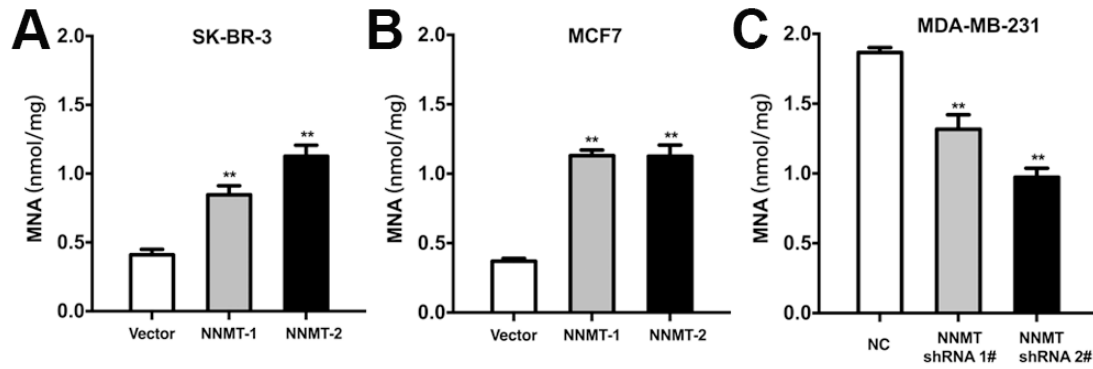

**Figure S2.** NNMT overexpression increases the intracellular levels of MNA in BCs. The intracellular MNA was detected by HPLC-UV. The intracellular MNA levels were significantly increased in cell lines of SK-BR-3 and MCF7 treated with pcDNA3.1/NNMT, whereas they were significantly decreased in cell lines of MDA-MB-231 with NNMT shRNA (n=3) (\*\* $p < 0.01$ ).
