# Supplementary material for: Nicotinamide N-methyltransferase enhances chemoresistance in breast cancer through SIRT1 protein stabilization
Source: Springer Nature journal article supplement (doi:10.1186/s13058-019-1150-z), 2019-05-17
Supplement: MOESM4 [file 16732068]

**Table S2.** Association of NNMT expression with molecular subtype on chemotherapy

response of 82 breast cancer patients with a chemotherapy efficacy record

| Molecular subtype | n  | NNMT <sup>h</sup> (%) | Pearson's $\chi^2$ | <i>P</i> |
|-------------------|----|-----------------------|--------------------|----------|
| Luminal A         | 20 | 6 (30.0)              | 0.087              | 0.769    |
| CR+PR             | 11 | 3 (27.3)              |                    |          |
| SD+PD             | 9  | 3 (33.3)              |                    |          |
| Luminal B         | 42 | 21 (50.0)             | 10.096             | 0.01     |
| CR+PR             | 16 | 3 (18.8)              |                    |          |
| SD+PD             | 26 | 18 (69.2)             |                    |          |
| ERBB2             | 13 | 6 (46.2)              | 0.929              | 0.335    |
| CR+PR             | 1  | 0 (0)                 |                    |          |
| SD+PD             | 12 | 6 (50.0)              |                    |          |
| Basal-like        | 6  | 4 (66.7)              | 1.500              | 0.221    |
| CR+PR             | 4  | 2 (50.0)              |                    |          |
| SD+PD             | 2  | 2 (100.0)             |                    |          |

NNMT<sup>h</sup>: NNMT high expression; CR: complete response; PR: partial response; SD: stable disease; PD: progressive disease
